# Supplementary material for: Tat inhibition by didehydro-Cortistatin A promotes heterochromatin formation at the HIV-1 long terminal repeat
Source: Springer Nature journal article supplement (doi:10.1186/s13072-019-0267-8), 2019-04-16
Supplement: 13072_2019_267_MOESM1_ESM.pdf [file 13072_2019_267_MOESM1_ESM.pdf]

Primer pairs used for MNase experiments Real-time-PCR (RT-PCR) in HeLa-CD4 cell:

|       |                           |
|-------|---------------------------|
| p1-F  | GATCTGTGGATCTACCACAC      |
| p1-R  | GCACCATCCAAAGGTCAGTGG     |
| p2-F  | CCTGATTGGCAGAACTACACAC    |
| p2-R  | TCTACTTGCTCTGGTTCAACTGG   |
| p3-F  | CCTTTGGATGGTGCTTCAAGTTAG  |
| p3-R  | ATGCTGGCTCATAGGGTGTAAC3   |
| p4-F  | GAGCAAGTAGAAGAGGCCAATG    |
| p4-R  | GAAATGCTAGGAGGCTGTCA      |
| p5-F  | GAGCCAGCATGGGATGG         |
| p5-R  | CTCCGGATGCAGCTCTC         |
| p6-F  | CCCGGAGGGAGAAGTATTAGTGT   |
| p6-R  | CCCTTGTAGAAAGCTCGATGTCA   |
| p7-F  | TGACAGCCTCCTAGCATTTTC     |
| p7-R  | CACACCTCCCTGGAAAGTC3      |
| p8-F  | TACTACAAAGACTGCTGACATCG   |
| p8-R  | TCTGAGGGCTCGCCACTC        |
| p9-F  | TCTACAAGGGACTTTCCGCTGG    |
| p9-R  | GCTTATATGTAGCATCTGAGGGCT  |
| p10-F | CTTTCCAGGGAGGTGTGGCCT     |
| p10-R | GGTCTAACCAGAGAGACCCAGTA   |
| p11-F | AGTGGCGAGCCCTCAGATG       |
| p11-R | AGCAGTGGGTTCCCTAGTTAGC    |
| p12-F | CCTGTACTGGGTCTCTCTGGTT    |
| p12-R | TTTGAGCACTCAAGGCAAGCTTTA  |
| p13-F | CTGGGAGCTCTCTGGCTAACTA    |
| p12-R | TTACCAGAGTCACACAACAGACG   |
| p14-F | CCACTGCTTAAGCCTCAATAAAGCT |
| p14-R | TCCACACTGACTAAAAGGGTCTGA  |
| p15-F | AGTGTGTGCCCGTCTGTTGTG     |
| p15-R | CTTTCGCTTTCAAGTCCCTGTTTCG |
| p16-F | GTGTGGAAAATCTCTAGCAGTG    |
| p16-R | CTTCAGCAAGCCGAGTCC        |
| p17-F | CGAACAGGGACTTGAAAGCGAAA   |
| p17-R | CGTACTCACCAGTCGCCGC       |
| p18-F | GAGATCTCTCGACGCAGGACT     |
| p18-R | CGCACCCATCTCTCTCCTTCTA    |
| p19-F | GCGACTGGTGAGTACGCCAA      |
| p19-R | CCCCTGGCCTTAACCGAATTT     |
| p20-F | GGTGCAGAGCGTCGGTATT       |
| P20-R | GTTCCCTGCTTGCCCATACT      |

Primer pairs used for MNase experiments RT-PCR in U1 cell:

p1-F GATCTGTGGATCTACCACAC  
p1-R GCACCATCCAAAGGTCAGTGG  
p2-F CCCTGATTGGCAGAACTACACAC  
p2-R CCTTTCTACCTGCCCTGGCT  
p3-F CCTTTGGATGGTGCTTCAAGTTAG  
p3-R ATGCAGGCTCATAGGGTGTAAC  
p4-F GGGCAGGTAGAAAGGGCCA  
p4-R GAAATGCTAGGAGGCTGTCA  
p5-F GAGCCTGCATGGGATGG  
p5-R CTCCGGATGCAGCTCTC  
p6-F TGACAGCCTCCTAGCATTTC  
p6-R CACACCTCCCTGGAAAGTC3  
p7-F TACTACAAAGACTGCTGACATCG  
p7-R TCTGAGGGCTCGCCACTC  
p8-F GGGACTTTCGCTGGGGAC  
p8-R CCCAGTACAGGCAAAAAGCAGC  
p9-F AGTGGCGAGCCCTCAGATG  
p9-R AAGCAGTGGGTTCCCTAGCTA  
p10-F CCTGTACTGGGTCTCTCTGGTT  
p10-R TTGTAGCACTCAAGGCAAGCTTTA  
p11-F CTGGGAGCTCTCTGGCTAGCTA  
p11-R TTACCAGAGTCACACAACAGACG  
p12-F CCACTGCTTAAGCCTCAATAAAGCT  
p12-R TCCACACTGACTAAAAGGGTCTGA  
p13-F AGTGTGTGCCCGTCTGTTGTG  
p12-R CTTTCGCTTTCAGTCCCTGTTTCG  
p14-F GTGTGGAAAATCTCTAGCAGTG  
p14-R C TTCAGCAAGCCGAGTCC  
p15-F CGAACAGGGACTTGAAAGCGAAA  
p15-R TTTGGCGTACTCACCAGTCGC  
p16-F GAGATCTCTCGACGCAGGACT  
p16-R CGCACCCATCTCTCTCCTTCTA  
p17-F GCGACTGGTGAGTACGCCAA  
p17-R CCCCTGGCCTTAACCGAATTT  
p18-F GGTGCGAGAGCGTCGGTATT  
p18-R GTTCCCTGCTTGCCCATACT

Primer pairs used for MNase experiments RT-PCR in ACH2 cell:

|       |                           |
|-------|---------------------------|
| p1-F  | GATCTGTGGATCTACCACAC      |
| p1-R  | GCACCATCCAAAGGTCAGTGG     |
| p2-F  | CCCTGATTGGCAGAACTACACAC   |
| p2-R  | GGCCTCTTCTACCTTATCTGGCT   |
| p3-F  | CCTTTGGATGGTGCTACAAGCTAG  |
| p3-R  | ATGCAGGCTCACAGGGTGTAAC    |
| p4-F  | GCCAGATAAGGTAGAAGAGGCCAA  |
| p4-R  | GCGGCTGTCAAACCTCCACT      |
| p5-F  | GTGAGCCTGCATGGAATGGAT     |
| p5-R  | CTCCGGATGCAGCTCTC         |
| p6-F  | TGACAGCCGCCTAGCATTCA      |
| p6-R  | CACGCCTCCCTGGAAAGTC       |
| p7-F  | GGAGTACTTCAAGAACTGCTGACA  |
| p7-R  | TCTGAGGGCTCGCCACTC        |
| p8-F  | GGGACTTCCGCTGGGGAC        |
| p8-R  | CCCAGTACAGGCAAAAAGCAGC    |
| p9-F  | AGTGGCGAGCCCTCAGATG       |
| p9-R  | AGCAGTGGGTTCCTAGTTAGC     |
| p10-F | CCTGTACTGGGTCTCTCTGGTT    |
| p10-R | TTGAAGCACTCAAGGCAAGCTTTA  |
| p11-F | GCTGGGAGTTCTCTGGCTAACTA   |
| p11-R | CAGAGTCATAACAACAGACGGGCA  |
| p12-F | CCACTGCTTAAGCCTCAATAAAGCT |
| p12-R | TCCACACTGACTAAAAGGGTCTGA  |
| p13-F | AGTGTGTGCCCGTCTGTTGTA     |
| p12-R | CTTTCGCTTTCAGGTCCCTGTTC   |
| p14-F | GTGTGGAAAATCTCTAGCAGTG    |
| p14-R | CTTCAGCAAGCCGAGTCC        |
| p15-F | CGAACAGGGACCTGAAAGCGAA    |
| p15-R | TTTGGCGTACTCACCAGTCGC     |
| p16-F | GAGCTCTCTCGACGCAGGACT     |
| p16-R | CGCACCCATCTCTCTCCTTCTA    |
| p17-F | GCGACTGGTGAGTACGCCAA      |
| p17-R | CCCCTGGCCTTAACCGAATTT     |
| p18-F | GGTGCAGAGCGTCAGTATT       |
| p18-R | GCTCCCTGCTTGCCCACT        |

Primer pairs used for RNAPII ChIP experiments RT-PCR in HeLa-CD4 cell:

p1-F CCCTGATTGGCAGAACTACACAC  
p1-R TCTACCTTATCTGGCTCAACTGGT  
p2-F GAGCCTGCATGGAATGGATGA  
p2-R GAAGTACTCCGGATGCAGCTCT  
p3-F GCTACAAGGGACTTTCCGCT  
p3-R GCTTATATGCAGCATCTGAGGGCT  
p4-F GGACTTTCCAGGGAGGCGT  
p4-R GGTCTAACCAGAGAGACCCAGTA  
p5-F AGTGGCGAGCCCTCAGATG  
p5-R AGCAGTGGGTTCCCTAGTTAGC  
p6-F CCTGTACTGGGTCTCTCTGGTT  
p6-R TTTGAGCACTCAAGGCAAGCTTTA  
p7-F TCTCTGGCTAACTAGGGAACC  
p7-R AAAGGGTCTGAGGGATCTCTAG  
p8-F AGTGTGTGCCCGTCTGTTGTG  
p8-R CTTTCGCTTTCAAGTCCCTGTTCG  
p9-F CGAACAGGGACTTGAAAGCGAAA  
p9-R CGTACTCACCAGTCGCCGC  
p10-F GCGACTGGTGAGTACGCCAA  
p10-R CCCCTGGCCTTAACCGAATTT  
p11-F GCAGTCCTCTATTGTGTGCATCAA  
p11-R CCTGTGTCAGCTGCTGCTTG  
p12-F CCATCAATGAGGAAGCTGCAGAA  
p12-R GGTGGATTATGTGTCATCCATCCT  
p13-F TTCTTCAGAGCAGACCAGAGC  
p12-R GCTGCCAAAGAGTGATCTGA  
p14-F CAGAAATACAGAAGCAGGGGCAA  
p14-R GTGTGGGCACCCTTCATTCTT  
p15-F ACTTACGGGGATACTTGGGCAG  
p15-R CTCCATTTCTTGCTCTCCTCTGTC  
p16-F TTGCTCAATGCCACAGCCAT  
p16-R TTTGACCACTTGCCACCCAT

Primer pairs used for RNAPII ChIP experiments RT-PCR in U1 cell:

p1-F CCCTGATTGGCAGAACTACACAC  
p1-R CCTTTCTACCTGCCCTGGCT  
p2-F GAGCCTGCATGGGATGG  
p2-R CTCCGGATGCAGCTCTC  
p3-F TCTACAAGGGACTTTCCGCTGG

p3-R GCTTATATGTAGCATCTGAGGGCT  
 p4-F CTTTCCAGGGAGGTGTGGCCT  
 p4-R GGTCTAACCAGAGAGACCCAGTA  
 p5-F AGTGGCGAGCCCTCAGATG  
 p5-R AAGCAGTGGGTTCCTAGCTA  
 p6-F CCTGTACTGGGTCTCTCTGGTT  
 p6-R TTGTAGCACTCAAGGCAAGCTTTA  
 p7-F CTGGGAGCTCTCTGGCTAGCTA  
 p7-R TTACCAGAGTCACACAACAGACG  
 p8-F AGTGTGTGCCCGTCTGTTGTG  
 p8-R CTTTCGCTTTCAAGTCCCTGTTTCG  
 p9-F CGAACAGGGACTTGAAAGCGAAA  
 p9-R TTTGGCGTACTCACCAGTCGC  
 p10-F GCGACTGGTGAGTACGCCAA  
 p10-R CCCCTGGCCTTAACCGAATTT  
 p11-F GCAGTCCTCTATTGTGTGCATCAA  
 p11-R CCTGTGTCAGCTGCTGCTTG  
 p12-F CCATCAATGAGGAAGCTGCAGAA  
 p12-R GGTGGATTATGTGTCATCCATCCT  
 p13-F TTCTTCAGAGCAGACCAGAGC  
 p12-R GCTGCCAAAGAGTGATCTGA  
 p14-F CAGAAATACAGAAGCAGGGGCAA  
 p14-R GTGTGGGCACCCTTCATTCTT  
 p15-F ACTTACGGGGATACTTGGGCAG  
 p15-R CTCCATTTCTTGCTCTCCTCTGTC

Primer pairs used for RNAPII ChIP experiments RT-PCR in ACH2 cell:

p1-F CCCTGATTGGCAGAACTACACAC  
 p1-R GGCTCTTCTACCTTATCTGGCT  
 p2-F GTGAGCCTGCATGGAATGGAT  
 p2-R CTCCGGATGCAGCTCTC  
 p3-F TCTACAAGGGACTTTCCGCTGG  
 p3-R GCTTATATGTAGCATCTGAGGGCT  
 p4-F CTTTCCAGGGAGGTGTGGCCT  
 p4-R GGTCTAACCAGAGAGACCCAGTA  
 p5-F AGTGGCGAGCCCTCAGATG  
 p5-R AGCAGTGGGTTCCTAGTTAGC  
 p6-F CCTGTACTGGGTCTCTCTGGTT  
 p6-R TTGAAGCACTCAAGGCAAGCTTTA  
 p7-F GCTGGGAGTTCTCTGGCTAACTA

p7-R CAGAGTCATACAACAGACGGGCA  
 p8-F AGTGTGTGCCCGTCTGTTGTA  
 p8-R CTTTCGCTTTTCAGGTCCCTGTTC  
 p9-F CGAACAGGGACCTGAAAGCGAA  
 p9-R TTTGGCGTACTCACCAGTCGC  
 p10-F GCGACTGGTGAGTACGCCAA  
 p10-R CCCCTGGCCTTAACCGAATTT  
 p11-F GCAGTCCTCTATTGTGTGCATCAA  
 p11-R CCTGTGTCAGCTGCTGCTTG  
 p12-F CCATCAATGAGGAAGCTGCAGAA  
 p12-R GGTGGATTATGTGTCATCCATCCT  
 p13-F TTCTTCAGAGCAGACCAGAGC  
 p12-R GCTGCCAAAGAGTGATCTGA  
 p14-F CAGAAATACAGAAGCAGGGGCAA  
 p14-R GTGTGGGCACCCTTCATTCTT  
 p15-F ACTTACGGGGATACTTGGGCAG  
 p15-R CTCCATTTCTTGCTCTCCTCTGTC  
 p16-F TTGCTCAATGCCACAGCCAT  
 p16-R TTTGACCACTTGCCACCCAT

Primer pairs used for Histone and BAF ChIP experiments RT-PCR in Hela-CD4 and OM10.1 cell:

Nuc-0-F CCTGATTGGCAGAACTACACAC  
 Nuc-0-R TCTACTTGCTCTGGTTCAACTGG  
 DHS-1-F TGACAGCCTCCTAGCATTTC  
 DHS-1-R CACACCTCCCTGGAAAGTC3  
 Nuc-1-F CTGGGAGCTCTCTGGCTAACTA  
 Nuc-1-R TTACCAGAGTCACACAACAGACG  
 DHS-2-F GAAAGCGAAAGTAAAGCCAGAGGA  
 DHS-2-R TTTGGCGTACTCACCAGTCGC  
 Nuc-2-F GCGACTGGTGAGTACGCCAA  
 Nuc-2-R CCCCTGGCCTTAACCGAATTT

Primer pairs used for Histone and BAF ChIP experiments RT-PCR in U1 cell:

Nuc-0-F CCCTGATTGGCAGAACTACACAC  
 Nuc-0-R CCTTTCTACCTGCCCTGGCT  
 DHS-1-F TGACAGCCTCCTAGCATTTC  
 DHS-1-R CACACCTCCCTGGAAAGTC3  
 Nuc-1-F CTGGGAGCTCTCTGGCTAGCTA  
 Nuc-1-R TTACCAGAGTCACACAACAGACG  
 DHS-2-F CGAACAGGGACTTGAAAGCGAAA  
 DHS-2-R TTTGGCGTACTCACCAGTCGC

Nuc-2-F GCGACTGGTGAGTACGCCAA  
Nuc-2-R CCCCTGGCCTTAACCGAATTT

Primer pairs used for Histone and BAF ChIP experiments RT-PCR in ACH2 cell:

Nuc-0-F CCCTGATTGGCAGAACTACACAC  
Nuc-0-R GGCCTCTTCTACCTTATCTGGCT  
DHS-1-F TGACAGCCGCCTAGCATTTCA  
DHS-1-R CACGCCTCCCTGGAAAGTC  
Nuc-1-F GCTGGGAGTTCTCTGGCTAACTA  
Nuc-1-R CAGAGTCATAACAACAGACGGGCA  
DHS-2-F GTGTGGAAAATCTCTAGCAGTG  
DHS-2-R CTTCAAGCAAGCCGAGTCC  
Nuc-2-F GAGCTCTCTCGACGCAGGACT  
Nuc-2-R CGCACCCATCTCTCTCCTTCTA

Control primer pairs used for Histone and BAF ChIP experiments RT-PCR:

GAPDH-F GGACCTGACCTGCCGTCTAGAA  
GAPDH-R GGTGTCGCTGTTGAAGTCAGAG  
RPL-10-F ACCCGTCTTCGACAGGACT  
RPL-10-R GGAACGGAAGACGAGAACAG

Primer pairs used for mRNA and Alu-PCR analysis:

HIV-mRNA-F TTGCTCAATGCCACAGCCAT  
HIV-mRNA-R TTTGACCACTTGCCACCCAT  
GAPDH-mRNA-F CAACAGCCTCAAGATCATCAGCA  
GAPDH-mRNA-R AGGGATGACCTTGCCCACAGCCTTGG  
TBP2-mRNA-F TGTGTGAAGTTACTCGTGTCAAA  
TBP2-mRNA-R GCAGGTACTCCGAAGTCTGT  
IL-1b-mRNA-F GTGGCAATGAGGATGACTTGTTTC  
IL-1b-mRNA-R TAGTGGTGGTCGGAGATTCGTA  
Alu1-F TCCCAGCTACTGGGGAGGCTGAGG  
Gag-R CCTGTGTCAGCTGCTGCTTG  
HIV-gag-F GGCTAACTAGGGAACCCACTG  
HIV-gag-R CTGCTAGAGATTTTCCACACTGAC
