# Supplementary material for: Tat inhibition by didehydro-Cortistatin A promotes heterochromatin formation at the HIV-1 long terminal repeat
Source: Springer Nature journal article supplement (doi:10.1186/s13072-019-0267-8), 2019-04-16

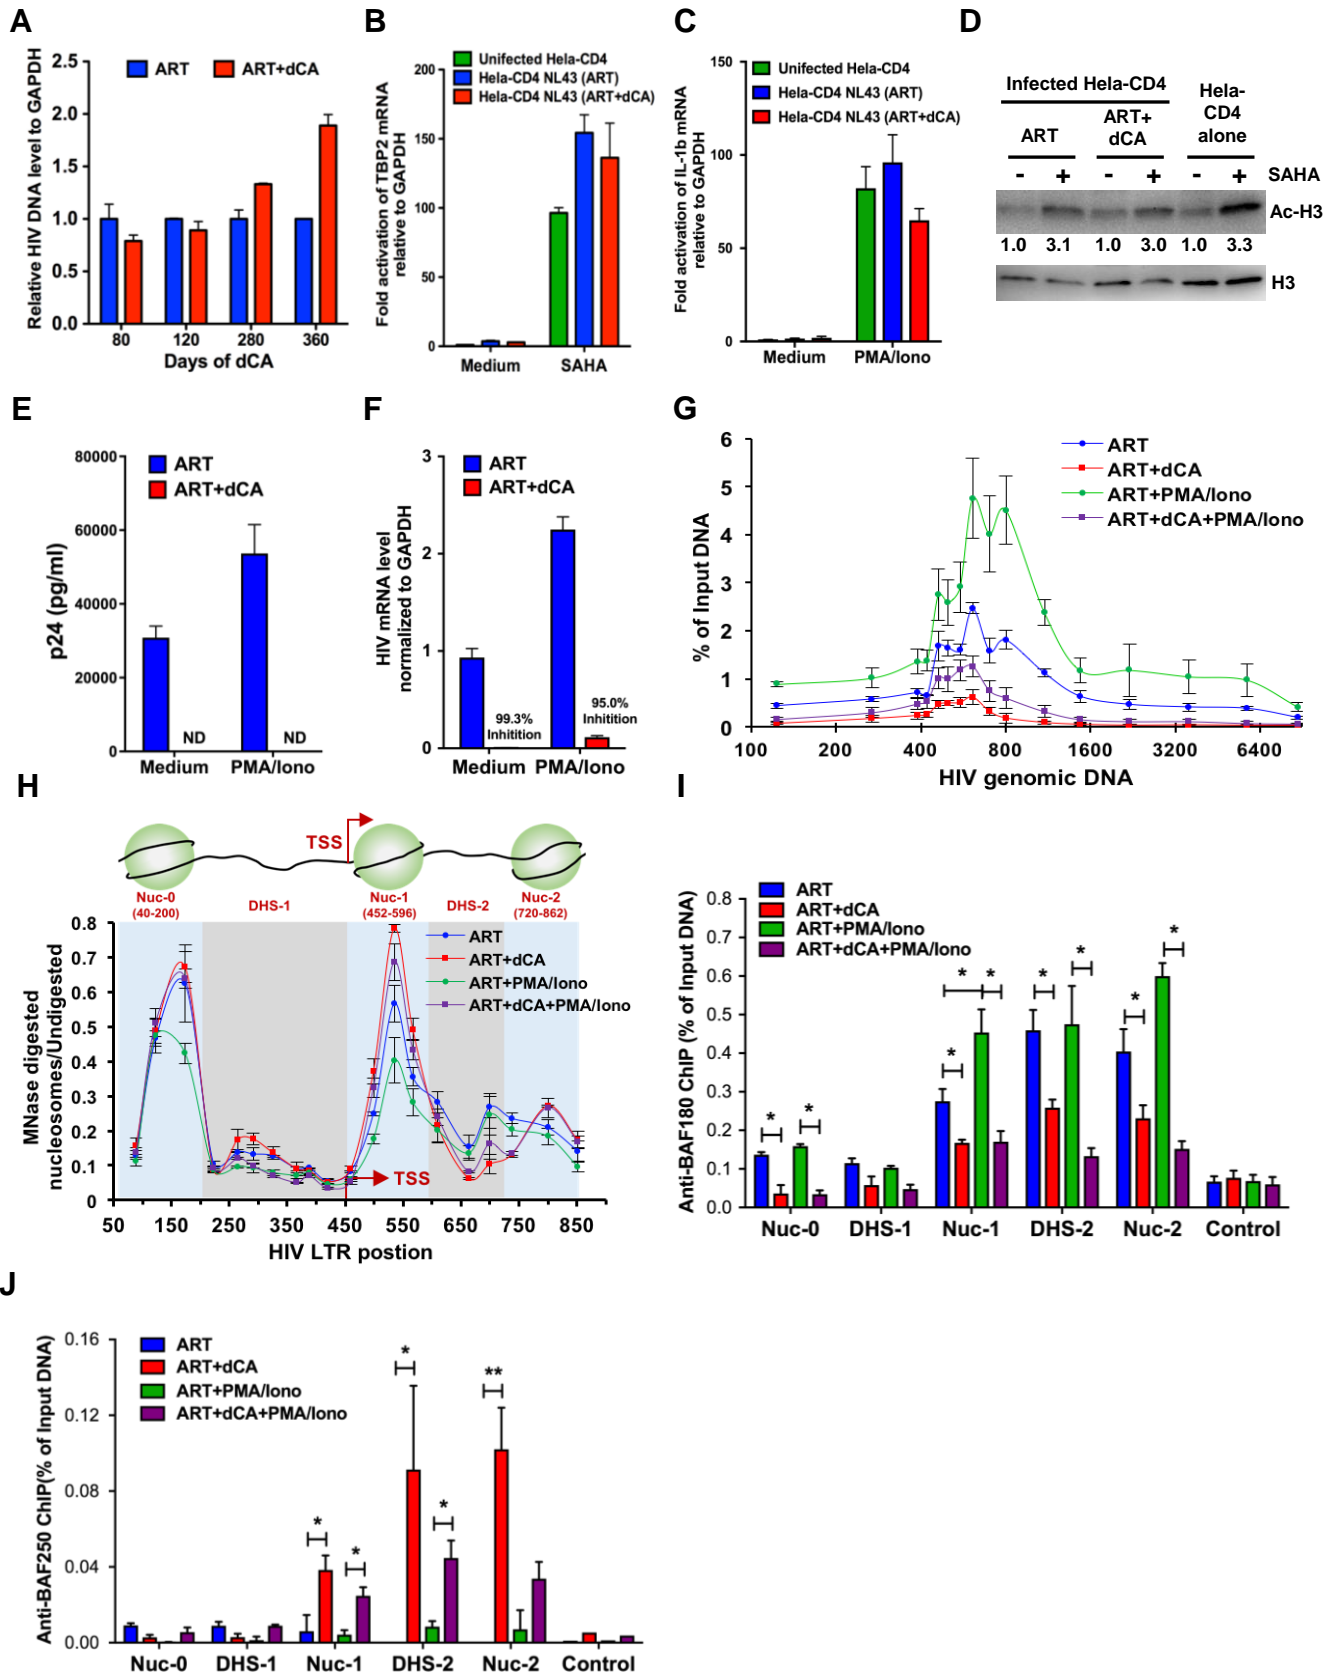

Supplement: 13072_2019_267_MOESM2_ESM.pdf [file 13072_2019_267_MOESM2_ESM.pdf]
